# Supplementary material
Source: publisher figshare collection journal article supplement (https://diabetesjournals.figshare.com/articles/dataset/_/19799728)
Supplement: Supplementary file 1 [file 1]

## Sheet: Integrated.markers100-526
	p_val	avg_log2FC	pct.1	pct.2	p_val_adj	cluster	gene
1	0	1.88374	0.943	0.763	0	0	Itm2a
2	3.12641e-272	0.931036	0.893	0.775	6.25282e-269	0	Fkbp1a
3	1.31465e-216	0.673325	0.895	0.802	2.62929e-213	0	Aldoa
4	5.94061e-146	0.868277	0.673	0.547	1.18812e-142	0	Lztfl1
5	2.31867e-134	0.735868	0.713	0.613	4.63735e-131	0	Ccr9
6	2.31966e-128	0.419628	0.508	0.349	4.63932e-125	0	Id2
7	1.73018e-100	0.251842	1	0.985	3.46036e-97	0	Rps2
8	7.72962e-97	0.256676	0.999	0.976	1.54592e-93	0	Actg1
9	3.32985e-94	0.316747	0.984	0.948	6.65969e-91	0	Hsp90ab1
10	4.09082e-80	0.352305	0.943	0.891	8.18165e-77	0	Cnbp
11	3.07565e-73	0.353888	0.95	0.911	6.1513e-70	0	Uqcrq
12	3.46628e-63	0.515908	0.832	0.811	6.93256e-60	0	Lef1
13	9.00535e-60	0.337282	0.867	0.823	1.80107e-56	0	Hnrnpa1
14	1.68143e-55	0.304789	0.603	0.499	3.36286e-52	0	Tomm40
15	3.25805e-55	0.403048	0.821	0.776	6.51611e-52	0	Lcp1
16	4.42124e-52	0.332245	0.516	0.414	8.84247e-49	0	Nab2
17	1.59796e-44	0.471376	0.774	0.779	3.19592e-41	0	Tuba1a
18	5.74833e-42	0.348134	0.808	0.754	1.14967e-38	0	Tesc
19	1.02244e-41	0.25209	0.88	0.803	2.04487e-38	0	Hmgn1
20	5.99909e-35	0.284611	0.718	0.648	1.19982e-31	0	Prmt1
21	8.20807e-34	0.295345	0.644	0.576	1.64161e-30	0	Cct3
22	3.27972e-33	0.339349	0.766	0.706	6.55944e-30	0	Asf1b
23	8.5871e-32	0.532012	0.465	0.389	1.71742e-28	0	Kif23
24	1.58521e-31	0.302871	0.761	0.758	3.17042e-28	0	Junb
25	1.89156e-31	0.251673	0.567	0.491	3.78312e-28	0	Apex1
26	5.30058e-30	0.368851	0.68	0.647	1.06012e-26	0	Aprt
27	2.7483e-26	0.474623	0.519	0.463	5.49661e-23	0	Tmem108
28	3.40984e-22	0.27213	0.626	0.577	6.81967e-19	0	Phb
29	2.14839e-19	0.569202	0.609	0.623	4.29679e-16	0	Bcl2
30	3.35846e-18	0.352158	0.436	0.377	6.71691e-15	0	Bach2
31	3.70914e-15	0.320089	0.505	0.461	7.41829e-12	0	Dusp10
32	5.84741e-15	0.437485	0.486	0.43	1.16948e-11	0	Egr1
33	8.13159e-15	0.264545	0.687	0.674	1.62632e-11	0	C1qbp
34	5.88559e-13	0.466925	0.482	0.448	1.17712e-09	0	Gm43352
35	2.73818e-07	0.325924	0.488	0.46	0.000547637	0	Socs1
36	1.05339e-06	0.378568	0.291	0.29	0.00210678	0	Prss2
37	6.15338e-06	0.326293	0.357	0.385	0.0123068	0	Il7r
38	1.63407e-05	0.283375	0.508	0.504	0.0326814	0	Tuba4a
39	0.00014642	0.340229	0.384	0.436	0.292841	0	Ptov1
40	0	1.92135	0.862	0.532	0	1	Ifi27l2a
41	0	1.20391	0.947	0.782	0	1	B2m
42	0	1.19259	0.88	0.704	0	1	H2-D1
43	0	0.499492	0.999	0.991	0	1	Rps26
44	0	0.482261	1	0.996	0	1	Tmsb4x
45	0	0.276066	0.518	0.194	0	1	Slc22a2
46	2.72367e-270	0.501085	0.525	0.246	5.44733e-267	1	Foxp3
47	8.5137e-239	0.612089	0.58	0.349	1.70274e-235	1	Rln3
48	1.35608e-227	0.794985	0.868	0.676	2.71216e-224	1	Emp3
49	5.45707e-205	1.05745	0.717	0.53	1.09141e-201	1	Klf2
50	4.31005e-202	0.925011	0.746	0.576	8.6201e-199	1	Itgb7
51	2.96276e-200	1.17163	0.658	0.445	5.92553e-197	1	Ms4a4b
52	2.61963e-199	0.423471	0.53	0.338	5.23925e-196	1	Ankrd55
53	8.7769e-194	0.80413	0.653	0.423	1.75538e-190	1	Foxo1
54	1.10778e-192	0.993416	0.674	0.473	2.21555e-189	1	Ms4a6b
55	8.16942e-189	0.499806	0.545	0.337	1.63388e-185	1	Ift80
56	8.74637e-173	0.619571	0.95	0.866	1.74927e-169	1	Ltb
57	9.18703e-171	0.792948	0.783	0.58	1.83741e-167	1	Smc4
58	2.22105e-169	0.521326	0.435	0.18	4.44211e-166	1	Ly6a
59	5.03233e-163	0.899783	0.806	0.67	1.00647e-159	1	Lgals1
60	9.2472e-162	0.411186	0.632	0.478	1.84944e-158	1	Tnfrsf4
61	2.06825e-158	0.417201	0.999	0.98	4.13649e-155	1	Cd52
62	1.31885e-157	0.733989	0.775	0.637	2.6377e-154	1	Tspo
63	5.00207e-156	0.637197	0.955	0.881	1.00041e-152	1	Vim
64	2.5954e-150	0.737305	0.65	0.456	5.19079e-147	1	Arl5c
65	3.43339e-150	0.70004	0.641	0.456	6.86679e-147	1	Mndal
66	8.99876e-149	0.651764	0.592	0.415	1.79975e-145	1	Bcl3
67	6.69044e-140	0.634189	0.537	0.385	1.33809e-136	1	Smpdl3a
68	7.84724e-140	0.670712	0.598	0.398	1.56945e-136	1	Sepp1
69	2.42377e-131	0.643049	0.715	0.563	4.84754e-128	1	Tnfrsf18
70	1.72882e-130	0.450581	0.566	0.413	3.45765e-127	1	Il2rb
71	2.81256e-130	0.646407	0.666	0.514	5.62513e-127	1	Chchd10
72	5.93715e-124	0.371334	0.552	0.391	1.18743e-120	1	Ecm1
73	1.15444e-119	0.738359	0.798	0.711	2.30888e-116	1	Ccr7
74	5.69705e-114	0.531362	0.667	0.52	1.13941e-110	1	Izumo1r
75	4.21125e-110	0.548347	0.877	0.848	8.4225e-107	1	Fxyd5
76	1.4574e-104	0.547313	0.446	0.279	2.9148e-101	1	Prr13
77	2.2152e-104	0.523659	0.627	0.496	4.4304e-101	1	Zbp1
78	6.49759e-103	0.47222	0.551	0.422	1.29952e-99	1	Igf2r
79	3.45662e-100	0.615173	0.733	0.603	6.91324e-97	1	Rasgrp2
80	9.47254e-100	0.626311	0.577	0.441	1.89451e-96	1	Irf7
81	1.72557e-91	0.519091	0.545	0.397	3.45114e-88	1	Stk10
82	3.27321e-91	0.497399	0.77	0.659	6.54642e-88	1	Ctsw
83	3.51791e-91	0.718476	0.716	0.645	7.03581e-88	1	Atp1b3
84	2.09334e-90	0.571069	0.737	0.634	4.18668e-87	1	Slfn2
85	8.24498e-89	0.594122	0.845	0.782	1.649e-85	1	Crip1
86	8.9843e-89	0.407232	0.503	0.38	1.79686e-85	1	Arhgap20
87	1.60736e-87	0.489469	0.819	0.754	3.21471e-84	1	Cytip
88	3.13673e-85	0.642534	0.562	0.453	6.27346e-82	1	Cyth4
89	1.95427e-83	0.878231	0.5	0.344	3.90853e-80	1	Sell
90	5.25513e-78	0.696892	0.568	0.455	1.05103e-74	1	H2-K1
91	1.72545e-72	0.883004	0.508	0.379	3.4509e-69	1	Slfn1
92	1.04673e-70	0.297581	0.538	0.419	2.09345e-67	1	Lta
93	3.00596e-70	0.300651	0.449	0.334	6.01193e-67	1	Itga4
94	1.87575e-69	0.585616	0.453	0.321	3.7515e-66	1	S1pr4
95	6.73572e-69	0.487976	0.656	0.558	1.34714e-65	1	Stat1
96	7.23039e-60	0.330359	0.691	0.563	1.44608e-56	1	Cd6
97	3.70715e-58	0.309539	0.623	0.505	7.4143e-55	1	Ikzf2
98	2.8014e-57	0.562317	0.478	0.358	5.60279e-54	1	Samhd1
99	9.7243e-57	0.673317	0.521	0.426	1.94486e-53	1	H2-Q1
100	1.51167e-55	0.638474	0.49	0.379	3.02334e-52	1	Tsc22d3
101	9.8212e-55	0.365412	0.698	0.585	1.96424e-51	1	Ifi27
102	8.64963e-54	1.01589	0.477	0.366	1.72993e-50	1	S1pr1
103	1.24679e-53	0.34796	0.582	0.478	2.49358e-50	1	H2-T23
104	1.33614e-53	0.349275	0.774	0.69	2.67228e-50	1	Lgals9
105	1.6295e-48	0.274047	0.526	0.416	3.259e-45	1	Ifnar2
106	4.41995e-47	0.542488	0.453	0.344	8.8399e-44	1	H2-Q6
107	6.36897e-46	0.37931	0.722	0.648	1.27379e-42	1	Cdkn2d
108	1.02352e-44	0.601007	0.459	0.367	2.04705e-41	1	Smad7
109	2.14303e-41	0.329912	0.794	0.734	4.28606e-38	1	S100a10
110	5.29002e-41	0.365711	0.369	0.26	1.058e-37	1	Crmp1
111	9.16883e-40	0.549062	0.599	0.538	1.83377e-36	1	Zfp36l2
112	1.00066e-39	0.390406	0.488	0.404	2.00132e-36	1	Adgre5
113	1.89111e-39	0.469039	0.537	0.461	3.78221e-36	1	Lfng
114	2.69377e-39	0.336658	0.449	0.371	5.38754e-36	1	Grifin
115	4.92696e-37	0.336042	0.374	0.206	9.85392e-34	1	D930028M14Rik
116	6.00535e-34	0.412993	0.534	0.461	1.20107e-30	1	1600014C10Rik
117	4.88227e-33	0.353163	0.63	0.558	9.76454e-30	1	Zfp36
118	1.14676e-30	0.33693	0.586	0.498	2.29353e-27	1	Id3
119	1.94312e-30	0.537105	0.448	0.376	3.88625e-27	1	Ctss
120	4.27935e-30	0.321676	0.505	0.437	8.55869e-27	1	Gyg
121	1.61393e-25	0.442712	0.439	0.375	3.22786e-22	1	Glipr2
122	2.99248e-22	0.274008	0.562	0.502	5.98496e-19	1	Dap
123	3.05672e-21	0.486861	0.479	0.44	6.11344e-18	1	BC021614
124	2.22215e-18	0.304814	0.68	0.675	4.44431e-15	1	Cdk2ap2
125	2.57036e-17	0.343258	0.332	0.42	5.14072e-14	1	Xaf1
126	8.43195e-16	0.372322	0.505	0.467	1.68639e-12	1	Gnpnat1
127	1.06906e-15	0.576153	0.46	0.428	2.13811e-12	1	Rasa3
128	1.10606e-13	0.430281	0.471	0.441	2.21211e-10	1	Add3
129	1.22254e-12	0.468184	0.468	0.445	2.44508e-09	1	Gimap5
130	2.2703e-11	0.350086	0.522	0.5	4.54059e-08	1	Bst2
131	5.72481e-11	0.370394	0.448	0.423	1.14496e-07	1	Irf9
132	7.24495e-09	0.315161	0.352	0.423	1.44899e-05	1	Cd7
133	3.41214e-08	0.302831	0.428	0.404	6.82429e-05	1	Pkp3
134	1.12394e-07	0.372069	0.415	0.405	0.000224788	1	Klhdc2
135	2.82524e-06	0.370391	0.321	0.239	0.00565048	1	Slfn5
136	8.81199e-05	0.512266	0.37	0.355	0.17624	1	Il6ra
137	0.00015464	0.373427	0.358	0.312	0.30928	1	Phf11b
138	0.000306523	0.569607	0.48	0.499	0.613047	1	Igfbp4
139	0.00188388	0.359967	0.423	0.431	1	1	Ifi203
140	0	1.47118	0.801	0.356	0	2	Ung
141	0	1.25712	0.899	0.536	0	2	Tipin
142	0	1.22723	0.817	0.487	0	2	Mcm6
143	0	1.21911	0.934	0.559	0	2	Dut
144	0	1.17365	0.766	0.424	0	2	Hells
145	0	1.14169	0.772	0.408	0	2	Mcm2
146	0	1.03652	0.731	0.402	0	2	Mcm5
147	0	0.99347	0.951	0.671	0	2	Ranbp1
148	0	0.790847	0.966	0.675	0	2	Tuba1b
149	0	0.781344	0.976	0.671	0	2	Stmn1
150	0	0.498178	1	0.986	0	2	Ptma
151	4.87022e-307	1.13098	0.741	0.44	9.74045e-304	2	Mcm3
152	3.68481e-299	0.849017	0.773	0.458	7.36962e-296	2	Siva1
153	1.21921e-272	0.749892	0.747	0.396	2.43841e-269	2	Dnmt1
154	1.15587e-269	0.435514	1	0.988	2.31173e-266	2	Ppia
155	1.51596e-261	0.9183	0.728	0.428	3.03192e-258	2	Cdca7
156	3.60713e-261	0.747717	0.957	0.76	7.21427e-258	2	Cdk4
157	7.73865e-260	0.948408	0.725	0.437	1.54773e-256	2	Mcm4
158	4.28023e-257	0.704712	0.991	0.853	8.56046e-254	2	Mif
159	2.48232e-253	0.76815	0.775	0.461	4.96465e-250	2	Pcna
160	7.14916e-253	0.791991	0.791	0.478	1.42983e-249	2	Slbp
161	5.72499e-246	0.922414	0.704	0.418	1.145e-242	2	Gmnn
162	5.0746e-235	0.752244	0.642	0.372	1.01492e-231	2	Apitd1
163	9.71732e-232	0.798625	0.773	0.478	1.94346e-228	2	Mcm7
164	1.65245e-222	0.719256	0.895	0.607	3.3049e-219	2	Set
165	2.13807e-215	0.640281	0.759	0.451	4.27613e-212	2	Nasp
166	6.42305e-215	0.758888	0.78	0.522	1.28461e-211	2	Rfc2
167	4.00167e-213	0.652085	0.841	0.536	8.00334e-210	2	Dek
168	1.1164e-212	0.751768	0.872	0.63	2.2328e-209	2	Nap1l1
169	1.35023e-202	0.69278	0.604	0.368	2.70047e-199	2	Gins2
170	5.74658e-201	0.746588	0.773	0.52	1.14932e-197	2	Dctpp1
171	1.34744e-199	0.710362	0.728	0.491	2.69488e-196	2	Fabp5
172	8.56477e-196	0.721767	0.651	0.402	1.71295e-192	2	Chaf1b
173	9.30715e-191	0.579666	0.981	0.837	1.86143e-187	2	Ran
174	1.5379e-190	0.505494	0.998	0.946	3.0758e-187	2	Npm1
175	5.20656e-187	0.553146	0.974	0.794	1.04131e-183	2	Anp32b
176	7.21501e-187	0.5238	0.596	0.366	1.443e-183	2	Rfc3
177	1.56603e-176	0.639007	0.899	0.645	3.13207e-173	2	Pa2g4
178	2.07916e-176	0.640907	0.747	0.469	4.15832e-173	2	Dnajc9
179	8.63113e-169	0.634618	0.655	0.389	1.72623e-165	2	Nrm
180	2.33864e-168	0.470291	0.997	0.934	4.67728e-165	2	Ybx1
181	8.92532e-166	0.5504	0.952	0.773	1.78506e-162	2	Nme2
182	1.77914e-165	0.607701	0.822	0.578	3.55829e-162	2	Impdh2
183	5.32816e-164	0.577872	0.739	0.46	1.06563e-160	2	Phgdh
184	8.13708e-161	0.506929	0.684	0.45	1.62742e-157	2	Meaf6
185	3.99918e-159	0.597958	0.62	0.39	7.99837e-156	2	Fen1
186	1.14989e-154	0.47279	0.633	0.421	2.29979e-151	2	Tyms
187	3.16957e-154	0.538962	0.951	0.737	6.33913e-151	2	Tesc
188	6.02656e-152	0.513085	0.969	0.77	1.20531e-148	2	Hint1
189	2.9564e-149	0.577382	0.612	0.407	5.9128e-146	2	Uhrf1
190	1.98188e-146	0.629081	0.733	0.504	3.96376e-143	2	Tfdp1
191	4.76444e-145	0.515275	0.87	0.619	9.52889e-142	2	Bola2
192	1.31442e-141	0.629262	0.695	0.481	2.62884e-138	2	Usp1
193	4.40101e-141	0.476266	0.971	0.824	8.80203e-138	2	Erh
194	5.21561e-141	0.524279	0.873	0.642	1.04312e-137	2	Pole4
195	1.07832e-140	0.515146	0.873	0.642	2.15664e-137	2	C1qbp
196	1.77295e-140	0.607487	0.655	0.473	3.5459e-137	2	Rfc4
197	3.11475e-139	0.573393	0.738	0.506	6.22949e-136	2	Tpi1
198	9.43568e-139	0.572399	0.639	0.441	1.88714e-135	2	Rfc5
199	2.09908e-136	0.515139	0.88	0.647	4.19817e-133	2	Nutf2
200	6.51207e-136	0.724038	0.584	0.355	1.30241e-132	2	Lig1
201	1.47656e-134	0.597873	0.655	0.454	2.95311e-131	2	Rpa2
202	5.67307e-134	0.470158	0.765	0.537	1.13461e-130	2	Rbmxl1
203	1.24312e-131	0.467845	0.794	0.547	2.48623e-128	2	Polr2f
204	1.25561e-131	0.481867	0.726	0.493	2.51122e-128	2	Srm
205	5.35682e-131	0.485348	0.92	0.703	1.07136e-127	2	Snrpd1
206	1.34026e-130	0.472662	0.48	0.2	2.68052e-127	2	Cdc6
207	1.40004e-129	0.556021	0.54	0.347	2.80009e-126	2	Dhfr
208	5.97574e-129	0.493388	0.897	0.695	1.19515e-125	2	Hspe1
209	1.59821e-128	0.477299	0.838	0.605	3.19641e-125	2	Stra13
210	8.88173e-128	0.59659	0.569	0.382	1.77635e-124	2	Prim1
211	4.24799e-127	0.475703	0.887	0.67	8.49598e-124	2	Higd1a
212	1.20433e-126	0.45059	0.959	0.744	2.40865e-123	2	Banf1
213	4.26393e-126	0.498813	0.517	0.273	8.52786e-123	2	Syce2
214	1.2473e-125	0.487922	0.951	0.749	2.49459e-122	2	Prdx1
215	1.94388e-125	0.465696	0.823	0.6	3.88775e-122	2	Fam162a
216	2.17552e-125	0.48493	0.515	0.317	4.35104e-122	2	Gins1
217	3.83384e-125	0.474113	0.763	0.526	7.66768e-122	2	Nop58
218	1.02792e-124	0.463155	0.954	0.767	2.05584e-121	2	Snrpb
219	5.76291e-120	0.45718	0.813	0.604	1.15258e-116	2	Nhp2
220	1.87321e-119	0.472867	0.781	0.551	3.74641e-116	2	Tagln2
221	3.42234e-119	0.482603	0.795	0.586	6.84468e-116	2	Fbl
222	6.55706e-117	0.485979	0.817	0.606	1.31141e-113	2	Ssrp1
223	7.41766e-116	0.51333	0.844	0.642	1.48353e-112	2	Tkt
224	8.32314e-110	0.456212	0.869	0.662	1.66463e-106	2	Rbbp7
225	8.69983e-110	0.445399	0.937	0.765	1.73997e-106	2	Cycs
226	2.42631e-109	0.451415	0.517	0.365	4.85262e-106	2	Rmi2
227	1.33984e-103	0.869593	0.639	0.469	2.67968e-100	2	Igfbp4
228	1.14376e-101	0.504344	0.649	0.479	2.28752e-98	2	Nelfe
229	4.25318e-98	0.443449	0.777	0.569	8.50635e-95	2	Hspd1
230	1.92794e-97	0.457694	0.548	0.42	3.85589e-94	2	Mms22l
231	5.17995e-92	0.436441	0.584	0.406	1.03599e-88	2	Orc6
232	2.1221e-88	0.460218	0.704	0.508	4.2442e-85	2	Paics
233	4.62497e-82	0.51946	0.527	0.388	9.24993e-79	2	Cdt1
234	2.81824e-80	0.436252	0.566	0.408	5.63649e-77	2	Haus4
235	3.90713e-77	0.452832	0.528	0.39	7.81425e-74	2	Tcf19
236	6.43196e-69	0.439266	0.574	0.437	1.28639e-65	2	Hat1
237	4.28253e-64	0.473802	0.506	0.391	8.56505e-61	2	Cdca7l
238	1.29365e-52	0.493727	0.506	0.406	2.58729e-49	2	Timeless
239	4.8502e-32	0.44158	0.362	0.192	9.7004e-29	2	E2f1
240	1.83108e-194	0.437686	0.457	0.104	3.66215e-191	3	Cd83
241	1.7927e-147	2.06063	0.761	0.494	3.5854e-144	3	Tnfrsf4
242	4.3787e-139	1.85762	0.637	0.3	8.7574e-136	3	Gadd45b
243	4.45059e-130	1.32506	0.797	0.512	8.90118e-127	3	Ikzf2
244	5.85037e-119	1.44943	0.642	0.362	1.17007e-115	3	Tnfrsf9
245	1.19301e-116	1.04685	0.494	0.161	2.38602e-113	3	Tagap
246	1.57684e-111	0.958207	0.521	0.24	3.15368e-108	3	Nr4a3
247	1.52947e-98	0.72874	0.563	0.303	3.05894e-95	3	Rgs16
248	1.69985e-89	0.927654	0.578	0.347	3.3997e-86	3	Bcl2a1b
249	7.65167e-86	0.630236	0.99	0.938	1.53033e-82	3	Eif5a
250	5.90201e-80	0.422181	0.458	0.217	1.1804e-76	3	Il2ra
251	4.93877e-79	1.21514	0.611	0.402	9.87755e-76	3	Batf
252	8.97422e-79	1.87268	0.575	0.34	1.79484e-75	3	Nfkbid
253	1.84563e-76	1.48772	0.769	0.554	3.69127e-73	3	Srgn
254	5.37979e-75	1.27248	0.866	0.7	1.07596e-71	3	Nfkbia
255	6.26474e-75	0.948343	0.646	0.434	1.25295e-71	3	Relb
256	4.58744e-70	1.09157	0.76	0.584	9.17488e-67	3	Tnfrsf18
257	9.03512e-69	1.0697	0.8	0.634	1.80702e-65	3	Marcksl1
258	9.04766e-68	0.763733	0.531	0.345	1.80953e-64	3	Zc3h12a
259	1.46663e-67	1.27697	0.66	0.467	2.93326e-64	3	Cd82
260	1.2721e-63	0.821438	0.637	0.425	2.54421e-60	3	B3gnt2
261	4.45148e-63	0.966326	0.619	0.414	8.90295e-60	3	Cd200
262	6.37475e-63	0.840417	0.519	0.326	1.27495e-59	3	Bcl2a1d
263	3.33354e-57	0.938086	0.55	0.352	6.66708e-54	3	Orai1
264	1.21562e-56	2.12984	0.568	0.395	2.43124e-53	3	Nr4a1
265	7.58638e-50	0.805354	0.558	0.396	1.51728e-46	3	Rilpl2
266	7.68424e-50	0.817339	0.588	0.453	1.53685e-46	3	Cd74
267	3.98426e-49	0.636938	0.662	0.483	7.96852e-46	3	Odc1
268	1.74587e-48	0.707077	0.541	0.371	3.49173e-45	3	Nfkb1
269	3.67814e-48	1.19515	0.488	0.293	7.35628e-45	3	Bcl2l11
270	5.24897e-47	0.808175	0.556	0.401	1.04979e-43	3	Rel
271	1.62105e-39	0.42342	0.995	0.957	3.24211e-36	3	Hsp90ab1
272	2.57689e-39	0.460193	0.391	0.178	5.15379e-36	3	Kit
273	2.94713e-39	0.517046	0.658	0.49	5.89426e-36	3	Nolc1
274	3.51301e-38	0.697402	0.712	0.578	7.02602e-35	3	Cd5
275	5.53073e-38	0.538554	0.983	0.952	1.10615e-34	3	Npm1
276	2.23229e-37	0.728488	0.726	0.602	4.46458e-34	3	Zfp36l1
277	2.07803e-35	0.400866	0.575	0.408	4.15605e-32	3	Ndufaf4
278	3.21961e-35	0.738578	0.532	0.422	6.43922e-32	3	Kdm2b
279	4.43218e-35	0.450181	0.639	0.468	8.86435e-32	3	Nsun2
280	5.19355e-35	0.37912	0.991	0.963	1.03871e-31	3	Hspa8
281	7.78542e-35	0.542146	0.572	0.419	1.55708e-31	3	Phlda1
282	1.36233e-34	0.703907	0.48	0.355	2.72467e-31	3	Gadd45g
283	4.97963e-34	0.489359	0.62	0.478	9.95925e-31	3	Ppa1
284	9.67097e-34	0.549312	0.809	0.67	1.93419e-30	3	C1qbp
285	3.09554e-33	0.561108	0.578	0.443	6.19107e-30	3	Bcl3
286	3.50202e-33	0.507677	0.538	0.4	7.00403e-30	3	Smyd2
287	4.40252e-32	0.427808	0.599	0.439	8.80504e-29	3	Ddx21
288	5.58238e-32	0.377773	0.625	0.459	1.11648e-28	3	Syncrip
289	3.84933e-31	0.673174	0.579	0.449	7.69865e-28	3	Ppan
290	1.79236e-29	0.623773	0.662	0.534	3.58472e-26	3	Serp1
291	1.82671e-29	0.481249	0.769	0.631	3.65342e-26	3	Hspa5
292	2.15058e-29	0.459695	0.783	0.666	4.30116e-26	3	G3bp1
293	2.25657e-29	0.406057	0.754	0.609	4.51313e-26	3	Tcp1
294	3.46716e-29	0.377292	0.563	0.435	6.93433e-26	3	Gnl3
295	1.13055e-28	0.760869	0.54	0.387	2.2611e-25	3	Rln3
296	5.45864e-28	0.571114	0.937	0.871	1.09173e-24	3	Mif
297	2.85653e-27	0.490959	0.744	0.628	5.71306e-24	3	Fam162a
298	1.73812e-26	0.54361	0.469	0.384	3.47624e-23	3	Fam132a
299	3.66659e-26	0.432866	0.774	0.645	7.33318e-23	3	Set
300	7.70756e-26	0.670902	0.644	0.523	1.54151e-22	3	Srm
301	3.45285e-25	0.728227	0.423	0.298	6.9057e-22	3	Dusp5
302	5.38638e-25	0.698232	0.446	0.312	1.07728e-21	3	Bcl2l1
303	1.14661e-24	0.65672	0.64	0.534	2.29322e-21	3	Dusp2
304	2.26658e-24	0.517159	0.717	0.594	4.53316e-21	3	Hspd1
305	5.86454e-23	0.368138	0.955	0.904	1.17291e-19	3	Cnbp
306	8.88153e-23	0.454165	0.538	0.43	1.77631e-19	3	Gsto1
307	1.21687e-21	0.411661	0.498	0.375	2.43373e-18	3	Bmyc
308	1.24414e-21	0.368435	0.903	0.838	2.48829e-18	3	Psme2
309	2.79412e-21	0.545424	0.677	0.587	5.58824e-18	3	Phb
310	3.75374e-21	0.510341	0.724	0.632	7.50747e-18	3	Nhp2
311	1.32665e-20	0.437698	0.777	0.678	2.65329e-17	3	Psma6
312	3.62744e-20	0.380292	0.808	0.677	7.25488e-17	3	Pa2g4
313	4.18654e-20	0.522575	0.62	0.525	8.37308e-17	3	Cd24a
314	1.81923e-19	0.756237	0.46	0.357	3.63846e-16	3	Nfkb2
315	1.94877e-19	0.561991	0.468	0.379	3.89755e-16	3	Birc3
316	2.27861e-19	0.415866	0.902	0.883	4.55722e-16	3	Ltb
317	2.84066e-19	0.415839	0.349	0.258	5.68131e-16	3	Nfkbiz
318	1.01413e-18	0.399199	0.726	0.634	2.02825e-15	3	Mrpl17
319	7.54963e-18	0.519566	0.774	0.724	1.50993e-14	3	Hspe1
320	1.00232e-17	0.404921	0.835	0.746	2.00463e-14	3	Ncl
321	3.11487e-16	0.956581	0.425	0.351	6.22973e-13	3	Icam1
322	4.38188e-16	0.396115	0.382	0.284	8.76377e-13	3	Tnfaip3
323	1.0233e-15	0.389024	0.588	0.494	2.04661e-12	3	Canx
324	8.1415e-15	0.529881	0.506	0.439	1.6283e-11	3	Lta
325	1.26577e-14	0.418392	0.698	0.632	2.53154e-11	3	Ptpn6
326	1.21553e-13	0.45583	0.392	0.299	2.43106e-10	3	Cd40lg
327	1.03379e-12	0.409103	0.54	0.452	2.06758e-09	3	Nop16
328	6.45002e-12	0.745616	0.443	0.376	1.29e-08	3	Cd69
329	6.64775e-12	0.366961	0.611	0.555	1.32955e-08	3	Kras
330	6.07722e-11	0.96442	0.46	0.433	1.21544e-07	3	Lmna
331	1.52706e-10	0.521217	0.806	0.773	3.05412e-07	3	Ier2
332	1.66733e-10	0.371604	0.485	0.4	3.33466e-07	3	Arhgap20
333	3.81806e-10	0.664634	0.548	0.493	7.63613e-07	3	Myc
334	5.21668e-09	0.503132	0.481	0.443	1.04334e-05	3	Nab2
335	1.02997e-08	0.466573	0.421	0.362	2.05994e-05	3	Cish
336	1.26296e-08	0.397179	0.452	0.385	2.52593e-05	3	Rcl1
337	1.76534e-07	0.543836	0.472	0.431	0.000353068	3	Kdm6b
338	2.86076e-06	0.411608	0.394	0.352	0.00572152	3	Smox
339	0.000131296	0.519365	0.286	0.348	0.262592	3	Cd274
340	0	4.03263	0.999	0.273	0	4	Hist1h2ap
341	0	3.11833	0.995	0.259	0	4	2810417H13Rik
342	0	2.86177	0.98	0.293	0	4	Rrm2
343	0	2.65156	0.973	0.235	0	4	Birc5
344	0	2.62813	0.997	0.704	0	4	Tuba1b
345	0	2.56458	0.997	0.468	0	4	H2afx
346	0	2.53037	1	0.597	0	4	Hmgb2
347	0	2.456	0.937	0.222	0	4	Hist1h1b
348	0	2.37539	0.845	0.243	0	4	Ube2c
349	0	2.36739	1	0.701	0	4	Stmn1
350	0	2.27779	0.98	0.305	0	4	Top2a
351	0	2.22421	0.982	0.421	0	4	Tyms
352	0	2.15937	0.94	0.091	0	4	Nusap1
353	0	2.12932	1	0.844	0	4	H2afz
354	0	1.99157	0.975	0.313	0	4	Spc24
355	0	1.94713	0.906	0.24	0	4	Hist1h2bj
356	0	1.924	0.901	0.304	0	4	Cks2
357	0	1.85763	0.907	0.246	0	4	Cdca8
358	0	1.82204	0.947	0.246	0	4	Tk1
359	0	1.80777	0.977	0.499	0	4	Slbp
360	0	1.80304	1	0.857	0	4	Tubb5
361	0	1.7518	0.919	0.136	0	4	Ccna2
362	0	1.72763	0.997	0.594	0	4	Dut
363	0	1.60311	0.86	0.133	0	4	Cdk1
364	0	1.59046	0.987	0.558	0	4	Dek
365	0	1.55085	0.951	0.432	0	4	Gmnn
366	0	1.53421	0.869	0.207	0	4	Cdca3
367	0	1.50304	0.997	0.821	0	4	H2afv
368	0	1.48423	1	0.988	0	4	Ptma
369	0	1.4386	0.844	0.269	0	4	Fbxo5
370	0	1.42436	0.827	0.087	0	4	Mxd3
371	0	1.40226	0.999	0.914	0	4	Hmgn2
372	0	1.39985	0.822	0.2	0	4	Mki67
373	0	1.36361	0.801	0.098	0	4	Spc25
374	0	1.33539	1	0.915	0	4	Hmgb1
375	0	1.33141	0.779	0.19	0	4	Hist1h1d
376	0	1.28681	0.787	0.055	0	4	Aurkb
377	0	1.26987	0.859	0.305	0	4	Cenpm
378	0	1.21957	0.747	0.112	0	4	Esco2
379	0	1.17452	0.728	0.104	0	4	Hist1h2ac
380	0	1.14888	0.775	0.138	0	4	Ccnb2
381	0	1.10957	0.75	0.116	0	4	Tpx2
382	1.61235e-304	1.48616	0.93	0.399	3.2247e-301	4	Nrm
383	5.1113e-302	1.48036	0.987	0.637	1.02226e-298	4	2700094K13Rik
384	6.5091e-298	1.37587	0.813	0.295	1.30182e-294	4	Hist1h1a
385	7.71681e-298	1.44142	0.985	0.533	1.54336e-294	4	Cks1b
386	2.05791e-291	1.32519	0.844	0.28	4.11582e-288	4	Tacc3
387	4.24993e-291	1.40109	0.93	0.456	8.49986e-288	4	Cenpw
388	4.91017e-291	1.47045	0.901	0.427	9.82035e-288	4	Smc2
389	4.80314e-288	1.56043	0.996	0.782	9.60629e-285	4	Crip1
390	3.25166e-284	1.73864	0.868	0.292	6.50332e-281	4	Hist1h3e
391	4.45326e-284	1.14546	0.995	0.789	8.90652e-281	4	Hint1
392	1.1179e-280	1.26207	0.872	0.36	2.2358e-277	4	Lig1
393	2.48763e-279	1.02316	0.736	0.186	4.97525e-276	4	Cdca5
394	2.19867e-277	1.1484	0.997	0.851	4.39735e-274	4	Ran
395	3.60473e-275	1.54317	0.97	0.571	7.20945e-272	4	Tubb4b
396	7.48308e-275	1.24913	0.806	0.259	1.49662e-271	4	Clspn
397	8.21203e-273	1.1954	0.721	0.174	1.64241e-269	4	Hist1h3i
398	5.39644e-271	1.72425	0.843	0.327	1.07929e-267	4	Hist1h1e
399	4.28817e-268	1.33388	0.944	0.434	8.57635e-265	4	Tmpo
400	7.50072e-268	1.05825	0.736	0.184	1.50014e-264	4	Ndc80
401	8.68034e-268	1.39194	0.954	0.506	1.73607e-264	4	Lmnb1
402	2.06558e-261	1.01998	0.687	0.144	4.13115e-258	4	Kif11
403	1.19452e-260	1.44744	0.942	0.483	2.38905e-257	4	Pcna
404	1.10111e-253	1.10524	0.992	0.812	2.20223e-250	4	Anp32b
405	1.56015e-252	1.37873	0.992	0.698	3.12029e-249	4	Emp3
406	3.18032e-249	1.21903	0.735	0.208	6.36065e-246	4	Hist1h2bm
407	1.74374e-246	1.16469	0.709	0.154	3.48747e-243	4	Prc1
408	4.12874e-242	1.25236	0.966	0.57	8.25748e-239	4	Tipin
409	1.60679e-237	1.61815	0.843	0.36	3.21358e-234	4	Hist1h2al
410	2.42111e-235	1.67263	0.779	0.321	4.84223e-232	4	Hist2h2bb.1
411	1.35251e-234	1.04595	0.997	0.856	2.70502e-231	4	Hnrnpa3
412	5.94069e-233	1.28492	0.702	0.142	1.18814e-229	4	Hist1h2ak
413	6.61678e-227	1.08157	0.753	0.271	1.32336e-223	4	Rad51
414	1.96978e-218	1.14571	0.978	0.649	3.93957e-215	4	Nap1l1
415	4.28401e-216	1.07675	0.964	0.532	8.56802e-213	4	Lsm2
416	8.70535e-214	1.12381	0.991	0.697	1.74107e-210	4	Ranbp1
417	1.30571e-212	1.12237	0.939	0.535	2.61142e-209	4	Dctpp1
418	2.80556e-211	1.10499	0.754	0.273	5.61112e-208	4	Ccne1
419	3.64095e-211	1.17385	0.812	0.387	7.28189e-208	4	Tcf19
420	1.07251e-210	1.18569	0.83	0.397	2.14502e-207	4	Rrm1
421	6.0687e-208	1.07098	0.728	0.236	1.21374e-204	4	Lockd
422	8.36216e-208	1.15842	0.905	0.455	1.67243e-204	4	Ezh2
423	4.27341e-206	1.07547	0.989	0.708	8.54682e-203	4	Asf1b
424	1.21801e-204	1.39624	0.765	0.313	2.43603e-201	4	Hist1h4d
425	4.48067e-204	1.04164	0.888	0.482	8.96134e-201	4	Nelfe
426	1.1235e-201	1.02611	0.892	0.363	2.247e-198	4	Ube2s
427	6.33476e-201	1.10914	0.967	0.607	1.26695e-197	4	Anapc11
428	1.70468e-196	1.05513	0.89	0.424	3.40937e-193	4	Dnmt1
429	1.7165e-188	1.26476	0.777	0.322	3.43299e-185	4	Pttg1
430	1.40055e-182	1.09518	0.747	0.356	2.80111e-179	4	Incenp
431	1.62164e-182	1.17175	0.741	0.306	3.24328e-179	4	Racgap1
432	2.96325e-179	1.02966	0.952	0.601	5.92651e-176	4	Smc4
433	7.64755e-174	1.16149	0.976	0.68	1.52951e-170	4	Lgals1
434	3.48033e-170	1.15492	0.72	0.314	6.96066e-167	4	Kpna2
435	4.31326e-166	1.65662	0.834	0.474	8.62652e-163	4	Igfbp4
436	1.44276e-151	1.03226	0.968	0.715	2.88552e-148	4	Ly6e
437	2.71441e-149	1.05875	0.664	0.228	5.42882e-146	4	Hist1h2ai
438	8.9058e-91	1.08832	0.668	0.352	1.78116e-87	4	Cenpa
439	1.52247e-69	1.0652	0.623	0.366	3.04495e-66	4	Tuba1c
440	7.0641e-281	2.55783	0.992	0.986	1.41282e-277	5	Malat1
441	5.46633e-245	3.13613	0.99	0.984	1.09327e-241	5	Lars2
442	4.32554e-230	2.65225	0.999	0.999	8.65109e-227	5	Gm42418
443	7.18618e-81	2.33153	0.737	0.634	1.43724e-77	5	Gm26870
444	2.58047e-61	1.72923	0.887	0.893	5.16095e-58	5	AY036118
445	1.05551e-58	0.386935	0.142	0.43	2.11102e-55	5	Rcc2
446	3.43834e-45	1.56587	0.563	0.43	6.87669e-42	5	Gm8730
447	4.25279e-45	0.27972	0.147	0.368	8.50558e-42	5	Sod1
448	1.13941e-40	2.10192	0.697	0.622	2.27883e-37	5	Gm26917
449	1.17023e-39	0.523675	0.43	0.309	2.34047e-36	5	Hist4h4
450	2.22045e-37	0.294751	0.45	0.313	4.4409e-34	5	Gadd45b
451	8.86164e-35	0.394709	0.126	0.336	1.77233e-31	5	Rnf213
452	1.71568e-28	0.639154	0.181	0.364	3.43136e-25	5	Myb
453	3.50888e-28	0.602291	0.448	0.319	7.01776e-25	5	Hist1h3e
454	4.58142e-24	0.355141	0.336	0.209	9.16284e-21	5	Rorc
455	1.71927e-23	0.274641	0.45	0.353	3.43854e-20	5	Il6ra
456	4.62919e-22	0.478457	0.213	0.393	9.25839e-19	5	Numa1
457	3.7721e-20	0.269781	0.382	0.301	7.5442e-17	5	Hist1h4h
458	9.68937e-20	0.307779	0.263	0.489	1.93787e-16	5	Dusp1
459	1.80516e-19	0.251734	0.343	0.586	3.61033e-16	5	Zfp36
460	8.84561e-19	0.50395	0.447	0.376	1.76912e-15	5	Ift80
461	1.70075e-18	0.35139	0.156	0.304	3.4015e-15	5	Klf3
462	6.54736e-18	0.263706	0.162	0.325	1.30947e-14	5	Ephb6
463	3.51205e-17	0.321834	0.452	0.374	7.0241e-14	5	Ankrd55
464	1.04512e-16	0.363074	0.396	0.622	2.09024e-13	5	Zfp36l1
465	2.38693e-16	0.306765	0.454	0.731	4.77386e-13	5	Ptms
466	9.82034e-16	0.349945	0.242	0.419	1.96407e-12	5	Ccng2
467	1.10828e-15	0.534291	0.385	0.298	2.21656e-12	5	Foxp3
468	1.22787e-14	0.513285	0.432	0.377	2.45574e-11	5	Cd69
469	2.57799e-14	1.51108	0.443	0.4	5.15598e-11	5	Erdr1
470	3.1805e-14	0.748062	0.541	0.474	6.361e-11	5	H2-K1
471	3.41976e-14	0.328324	0.372	0.324	6.83953e-11	5	Dock9
472	2.58917e-13	0.654143	0.277	0.437	5.17834e-10	5	Phlda1
473	3.2201e-13	0.273375	0.178	0.307	6.44019e-10	5	Iqgap2
474	6.42221e-13	0.33742	0.383	0.659	1.28444e-09	5	Ccr9
475	6.78225e-13	0.327392	0.271	0.43	1.35645e-09	5	Ctcf
476	1.67821e-12	0.253302	0.315	0.446	3.35642e-09	5	Fcho1
477	2.75588e-12	0.301167	0.391	0.347	5.51175e-09	5	Nfatc1
478	3.15751e-12	0.259938	0.268	0.393	6.31501e-09	5	Gpr83
479	2.42592e-11	0.766002	0.292	0.441	4.85183e-08	5	Kdm6b
480	2.4651e-11	0.332464	0.429	0.678	4.93019e-08	5	Ubc
481	4.99842e-11	0.255612	0.353	0.323	9.99684e-08	5	G2e3
482	7.39244e-11	0.41732	0.289	0.435	1.47849e-07	5	Stk10
483	1.14549e-10	0.457855	0.447	0.618	2.29098e-07	5	Flna
484	2.28567e-10	0.282214	0.355	0.514	4.57135e-07	5	Tuba4a
485	2.13698e-09	0.31381	0.278	0.392	4.27397e-06	5	Smad7
486	2.92663e-09	0.548712	0.214	0.353	5.85326e-06	5	Rmnd5a
487	4.1635e-09	0.392489	0.31	0.261	8.32699e-06	5	Gimap3
488	4.66282e-09	0.423181	0.29	0.438	9.32564e-06	5	Pbrm1
489	6.29879e-09	0.554959	0.335	0.298	1.25976e-05	5	Rasl11b
490	7.18019e-09	0.921007	0.355	0.312	1.43604e-05	5	Neat1
491	1.05334e-08	1.32834	0.48	0.457	2.10668e-05	5	Polr2a
492	1.22323e-08	0.452458	0.219	0.32	2.44647e-05	5	Gm10800
493	5.21528e-08	0.757704	0.389	0.372	0.000104306	5	Dnah8
494	6.45001e-07	0.376483	0.326	0.324	0.00129	5	Ryr2
495	1.4329e-06	0.447055	0.408	0.394	0.0028658	5	Pou2f2
496	2.85869e-06	0.388576	0.313	0.281	0.00571738	5	Rapgef4
497	7.33729e-06	0.558897	0.429	0.403	0.0146746	5	H2-Q4
498	9.06143e-06	0.332593	0.257	0.362	0.0181229	5	Hjurp
499	1.89044e-05	0.412191	0.29	0.414	0.0378087	5	Gbp4
500	1.90145e-05	0.588281	0.342	0.334	0.038029	5	Gramd1b
501	3.0584e-05	0.434175	0.617	0.767	0.061168	5	Junb
502	3.73812e-05	0.300091	0.376	0.496	0.0747625	5	Hnrnpd
503	6.75885e-05	0.413555	0.353	0.454	0.135177	5	Igf2r
504	0.000105652	0.386385	0.402	0.411	0.211305	5	Plekho1
505	0.000118444	0.499418	0.426	0.547	0.236887	5	Dusp2
506	0.000120503	0.443726	0.562	0.718	0.241006	5	Nfkbia
507	0.000130051	0.354976	0.379	0.376	0.260101	5	Cdk6
508	0.000144662	0.520856	0.508	0.659	0.289325	5	Rpl23a
509	0.000458914	0.261233	0.607	0.76	0.917827	5	Ncl
510	0.000544204	0.399823	0.216	0.256	1	5	Igf1r
511	0.000559039	0.55159	0.278	0.26	1	5	Nav2
512	0.000678514	0.503728	0.383	0.382	1	5	Nfkb1
513	0.000747237	1.04001	0.346	0.336	1	5	Chka
514	0.000925926	0.746119	0.663	0.808	1	5	Rps15
515	0.000943486	0.276456	0.354	0.451	1	5	Pim2
516	0.00101191	0.509076	0.397	0.395	1	5	Bach2
517	0.00153509	0.268826	0.29	0.42	1	5	Fos
518	0.00187004	0.362082	0.405	0.411	1	5	Rel
519	0.00199345	0.790341	0.365	0.363	1	5	Ano6
520	0.00216868	0.407398	0.203	0.267	1	5	Nfkbiz
521	0.00366741	0.380984	0.317	0.403	1	5	Id2
522	0.00405595	0.294648	0.259	0.349	1	5	Malt1
523	0.00415524	0.973196	0.281	0.266	1	5	2900060B14Rik
524	0.00465103	0.420314	0.432	0.524	1	5	Smchd1
525	0.00901132	0.369534	0.241	0.311	1	5	Mir142hg
526	0	1.68959	0.646	0.028	0	6	Ly6d
527	0	1.2988	0.606	0.032	0	6	Tctex1d1
528	0	0.981475	0.683	0.034	0	6	Endou
529	0	0.882812	0.644	0.019	0	6	P2rx1
530	0	0.560756	0.615	0.042	0	6	Rapgef3
531	4.59132e-242	2.22018	0.953	0.774	9.18265e-239	6	Ccnd3
532	3.72035e-231	2.00559	0.707	0.121	7.44069e-228	6	Dntt
533	7.0015e-230	1.72329	0.975	0.794	1.4003e-226	6	Thy1
534	2.36586e-226	2.4756	0.868	0.42	4.73171e-223	6	Cd8b1
535	1.48145e-202	0.68417	0.628	0.106	2.9629e-199	6	2900079G21Rik
536	1.17652e-179	2.40185	0.824	0.39	2.35304e-176	6	Ifngr1
537	1.19648e-138	1.01418	0.984	0.917	2.39296e-135	6	Hmgb1
538	9.0927e-125	0.561735	0.462	0.032	1.81854e-121	6	Lypd1
539	5.5496e-123	1.51584	0.852	0.647	1.10992e-119	6	Ap3s1
540	6.24514e-123	1.76243	0.799	0.549	1.24903e-119	6	Ldhb
541	3.27676e-119	1.74637	0.739	0.356	6.55353e-116	6	H2-Q2
542	1.92109e-117	1.02456	0.766	0.39	3.84218e-114	6	Ccng2
543	1.7306e-116	1.94443	0.655	0.238	3.46119e-113	6	Gm15340
544	4.84442e-111	1.64322	0.772	0.436	9.68884e-108	6	Sla
545	1.57047e-105	1.9899	0.761	0.482	3.14095e-102	6	Cd8a
546	3.42172e-105	0.637416	1	0.992	6.84343e-102	6	H3f3b
547	1.32539e-104	0.59745	0.49	0.046	2.65077e-101	6	Gpr25
548	1.68417e-102	1.58527	0.698	0.378	3.36835e-99	6	Colq
549	1.51093e-101	1.89361	0.719	0.383	3.02186e-98	6	Anxa2
550	6.73209e-96	1.76931	0.671	0.307	1.34642e-92	6	H2-T3
551	5.59442e-91	1.73565	0.782	0.469	1.11888e-87	6	H2-T22
552	6.95146e-90	1.39447	0.833	0.634	1.39029e-86	6	Ccr9
553	9.54211e-90	1.39235	0.791	0.517	1.90842e-86	6	Cd24a
554	1.08589e-88	1.93631	0.631	0.194	2.17177e-85	6	Rorc
555	3.89998e-84	2.134	0.674	0.328	7.79996e-81	6	Rmnd5a
556	1.51226e-82	0.784969	0.557	0.249	3.02452e-79	6	Cd163l1
557	2.45136e-77	1.05982	0.556	0.15	4.90272e-74	6	Syt13
558	4.11993e-76	1.85466	0.639	0.306	8.23986e-73	6	Prrt1
559	5.61668e-75	0.708208	0.991	0.986	1.12334e-71	6	Malat1
560	1.93328e-73	1.03467	0.864	0.709	3.86656e-70	6	Psap
561	3.23888e-71	1.15464	0.837	0.634	6.47777e-68	6	Marcksl1
562	5.52637e-70	1.18376	0.8	0.597	1.10527e-66	6	Sh2d1a
563	8.21435e-70	1.08301	0.607	0.279	1.64287e-66	6	Klf3
564	2.62325e-69	1.36008	0.729	0.459	5.2465e-66	6	Edem1
565	2.65769e-67	0.787101	0.559	0.22	5.31538e-64	6	a
566	4.66083e-60	0.569726	0.505	0.135	9.32167e-57	6	P3h4
567	1.82439e-58	1.68719	0.664	0.433	3.64878e-55	6	Ppp1r14b
568	7.1311e-58	1.42936	0.634	0.349	1.42622e-54	6	Ano6
569	1.97317e-56	1.48368	0.627	0.347	3.94635e-53	6	Slc16a5
570	1.41999e-55	2.07858	0.585	0.184	2.83998e-52	6	Arpp21
571	3.80689e-54	1.70068	0.575	0.211	7.61378e-51	6	Nebl
572	4.37372e-53	0.749998	0.56	0.312	8.74745e-50	6	RP23-428N8.3
573	2.54722e-52	1.30787	0.658	0.399	5.09445e-49	6	Ets2
574	1.2208e-49	1.19328	0.794	0.632	2.4416e-46	6	Gm26870
575	6.93036e-47	0.677344	0.52	0.231	1.38607e-43	6	Sdc4
576	3.97414e-43	0.797388	0.544	0.295	7.94828e-40	6	Lig4
577	1.10529e-42	1.78705	0.575	0.288	2.21058e-39	6	Chrna9
578	5.50691e-41	0.792784	0.599	0.38	1.10138e-37	6	Agfg2
579	3.41666e-40	0.822147	0.519	0.247	6.83331e-37	6	Nav2
580	1.84922e-39	0.98026	0.612	0.365	3.69844e-36	6	Trp53i11
581	1.17247e-37	0.688018	0.519	0.258	2.34493e-34	6	Ldlrad4
582	3.14731e-33	0.508595	0.677	0.427	6.29463e-30	6	Sepp1
583	2.50067e-31	0.824501	0.652	0.431	5.00133e-28	6	Cmtm7
584	1.99809e-30	0.839975	0.834	0.71	3.99619e-27	6	Ptms
585	7.64811e-29	0.572769	0.274	0.061	1.52962e-25	6	Cbfa2t3
586	1.66151e-28	0.632639	0.477	0.199	3.32303e-25	6	Aqp11
587	4.83326e-27	0.519061	0.53	0.322	9.66653e-24	6	Ddah2
588	9.57032e-27	0.53725	0.929	0.826	1.91406e-23	6	H2afv
589	4.39603e-26	0.784979	0.673	0.486	8.79207e-23	6	Arl5c
590	5.6665e-23	1.35707	0.625	0.534	1.1333e-19	6	Nsg2
591	6.03962e-23	0.708968	0.794	0.679	1.20792e-19	6	Psma6
592	1.37367e-22	0.681637	0.861	0.724	2.74734e-19	6	Ly6e
593	1.80674e-22	0.570597	0.519	0.309	3.61349e-19	6	Bcl2l1
594	1.89479e-22	1.26676	0.604	0.439	3.78959e-19	6	Btg2
595	5.96784e-22	1.38557	0.524	0.307	1.19357e-18	6	Desi1
596	1.75225e-19	0.999997	0.573	0.396	3.5045e-16	6	Rcbtb2
597	3.51641e-19	0.763359	0.753	0.705	7.03282e-16	6	Lgals9
598	1.94632e-18	0.952917	0.673	0.507	3.89265e-15	6	Id3
599	1.9997e-18	0.606254	0.443	0.155	3.9994e-15	6	Prodh
600	2.3181e-18	0.527672	0.567	0.382	4.6362e-15	6	Sh3bgrl
601	4.47074e-18	0.814544	0.686	0.621	8.94148e-15	6	Csrp1
602	6.51627e-18	1.43339	0.575	0.44	1.30325e-14	6	Lmo4
603	8.64985e-18	0.844471	0.505	0.306	1.72997e-14	6	Trat1
604	5.33806e-16	0.711793	0.299	0.025	1.06761e-12	6	Rag2
605	1.72944e-15	1.00862	0.606	0.459	3.45887e-12	6	H1f0
606	5.13961e-15	0.899082	0.495	0.308	1.02792e-11	6	Ctsl
607	7.06469e-15	0.558764	0.61	0.45	1.41294e-11	6	Polr2a
608	9.60753e-15	0.723863	0.628	0.478	1.92151e-11	6	Rbmx
609	8.29451e-10	0.621922	0.673	0.582	1.6589e-06	6	Lztfl1
610	2.95917e-09	0.597383	0.471	0.33	5.91834e-06	6	Padi4
611	8.97335e-09	0.583423	0.559	0.425	1.79467e-05	6	Ada
612	7.8892e-08	0.942173	0.456	0.302	0.000157784	6	Gtf2h4
613	4.04831e-07	1.06074	0.428	0.162	0.000809662	6	Gzma
614	4.22633e-07	1.12854	0.499	0.379	0.000845267	6	Jun
615	2.29532e-06	0.84366	0.57	0.506	0.00459064	6	Lbr
616	2.33319e-05	0.749789	0.561	0.473	0.0466637	6	Them6
617	3.21803e-05	0.664086	0.612	0.571	0.0643606	6	Zfp36
618	7.20721e-05	0.548017	0.606	0.51	0.144144	6	Pycr2
619	0.000192076	0.661369	0.35	0.242	0.384152	6	Gpr162
620	0.000386073	1.11396	0.45	0.311	0.772146	6	Cerk
621	0.000641436	1.07008	0.452	0.33	1	6	Tubb2b
622	0.00117758	0.700043	0.428	0.303	1	6	Slamf6
623	0.00318156	0.519344	0.329	0.138	1	6	Xrra1
624	0.00366183	0.902253	0.489	0.409	1	6	Fos
625	0.00813321	1.40526	0.449	0.349	1	6	Myb
626	0	2.64797	0.987	0.274	0	7	2810417H13Rik
627	0	1.21967	0.781	0.109	0	7	Pbk
628	1.76168e-307	2.15664	1	0.917	3.52337e-304	7	Hmgb1
629	7.20095e-293	1.66545	0.834	0.156	1.44019e-289	7	Ccna2
630	2.31755e-291	2.36398	1	0.847	4.63509e-288	7	H2afz
631	5.19474e-291	2.79736	0.998	0.605	1.03895e-287	7	Hmgb2
632	4.12267e-281	1.54136	1	0.988	8.24534e-278	7	Ptma
633	8.31243e-275	2.54315	0.945	0.309	1.66249e-271	7	Rrm2
634	2.94783e-273	2.20818	1	0.708	5.89566e-270	7	Stmn1
635	3.90885e-272	1.88176	1	0.916	7.8177e-269	7	Hmgn2
636	6.06343e-269	2.16459	0.899	0.254	1.21269e-265	7	Birc5
637	6.62446e-269	1.75109	0.829	0.149	1.32489e-265	7	Gzma
638	1.80477e-250	1.42944	0.813	0.15	3.60954e-247	7	Cdk1
639	2.94737e-235	1.92621	0.996	0.603	5.89474e-232	7	Dut
640	1.36698e-229	2.20161	0.994	0.72	2.73397e-226	7	Ly6e
641	4.19691e-228	1.50859	0.89	0.261	8.39382e-225	7	Cdca8
642	4.92906e-224	1.74873	0.975	0.549	9.85811e-221	7	Anp32e
643	1.60303e-221	2.79617	0.907	0.292	3.20605e-218	7	Hist1h2ap
644	5.25075e-211	1.82936	0.973	0.509	1.05015e-207	7	Slbp
645	3.23764e-205	1.50112	0.888	0.322	6.47527e-202	7	Top2a
646	1.24304e-204	1.43108	0.996	0.825	2.48607e-201	7	H2afv
647	8.19873e-195	1.55273	0.97	0.515	1.63975e-191	7	Lmnb1
648	4.28783e-194	1.36269	0.996	0.795	8.57566e-191	7	Thy1
649	4.56917e-194	1.50899	0.714	0.118	9.13834e-191	7	Nusap1
650	3.06931e-191	1.56117	0.918	0.444	6.13862e-188	7	Gmnn
651	3.29648e-191	1.31667	0.994	0.749	6.59296e-188	7	Txn1
652	1.26098e-190	1.4865	0.987	0.644	2.52197e-187	7	Ap3s1
653	2.9143e-190	1.19919	1	0.811	5.82859e-187	7	Hnrnpab
654	4.66554e-190	1.20523	0.8	0.206	9.33108e-187	7	Nebl
655	1.20984e-188	1.57263	0.979	0.567	2.41968e-185	7	Dek
656	2.02422e-187	1.31962	0.996	0.816	4.04845e-184	7	Anp32b
657	2.25872e-187	1.36259	0.712	0.113	4.51743e-184	7	Cenpf
658	4.56104e-187	1.34342	0.998	0.774	9.12208e-184	7	Ccnd3
659	3.03094e-184	1.22138	0.834	0.265	6.06188e-181	7	Tk1
660	5.15517e-183	1.42053	0.844	0.297	1.03103e-179	7	Desi1
661	7.49513e-183	1.79373	0.987	0.71	1.49903e-179	7	Tuba1b
662	2.19657e-180	2.21936	0.922	0.482	4.39313e-177	7	H2afx
663	5.91866e-178	1.26211	0.99	0.726	1.18373e-174	7	Snrpd1
664	7.01666e-175	1.48746	0.922	0.445	1.40333e-171	7	Tmpo
665	7.26157e-175	1.26924	0.989	0.735	1.45231e-171	7	Nhp2l1
666	2.63272e-171	1.10949	1	0.854	5.26543e-168	7	Ran
667	2.01323e-170	1.44249	0.95	0.521	4.02646e-167	7	Hmga1
668	3.64772e-168	1.15887	0.996	0.769	7.29544e-165	7	Banf1
669	1.96268e-167	1.2089	0.762	0.215	3.92536e-164	7	Mki67
670	1.15372e-165	1.76047	0.882	0.437	2.30743e-162	7	Tyms
671	7.28162e-163	1.28435	0.867	0.431	1.45632e-159	7	Hmgb3
672	7.40251e-161	1.08052	0.771	0.244	1.4805e-157	7	Lockd
673	2.92089e-160	1.29916	0.968	0.645	5.84178e-157	7	2700094K13Rik
674	3.43171e-159	1.25638	0.968	0.578	6.86343e-156	7	Tipin
675	1.61906e-157	1.19104	0.821	0.303	3.23812e-154	7	Xrcc6
676	2.78787e-157	1.36692	0.893	0.392	5.57574e-154	7	Ifngr1
677	4.70163e-154	1.34126	0.893	0.458	9.40326e-151	7	Cdca7
678	7.28175e-151	1.34299	0.827	0.333	1.45635e-147	7	Spc24
679	2.12161e-147	1.1686	0.897	0.485	4.24322e-144	7	Rfc4
680	2.84245e-147	2.6538	0.789	0.306	5.68489e-144	7	H2-T3
681	3.12693e-147	1.15986	0.916	0.432	6.25386e-144	7	Dnmt1
682	1.10477e-146	1.14902	0.69	0.132	2.20954e-143	7	Tpx2
683	6.7658e-146	1.14277	0.84	0.372	1.35316e-142	7	Lig1
684	5.65181e-142	1.50255	0.901	0.494	1.13036e-138	7	Pcna
685	1.92477e-139	1.07178	0.992	0.788	3.84955e-136	7	Srsf2
686	4.96924e-138	1.17818	0.964	0.656	9.93849e-135	7	Nap1l1
687	1.98673e-137	1.28236	0.838	0.423	3.97345e-134	7	Uhrf1
688	2.75164e-137	1.05032	0.872	0.461	5.50327e-134	7	Gm6594
689	3.96051e-137	1.22748	0.909	0.423	7.92101e-134	7	Cd8b1
690	1.16269e-136	1.92978	0.752	0.244	2.32539e-133	7	Hist1h1b
691	3.26602e-136	2.48333	0.76	0.259	6.53204e-133	7	Ube2c
692	1.117e-135	1.15313	0.99	0.704	2.234e-132	7	Ranbp1
693	1.1957e-135	1.19134	0.857	0.439	2.3914e-132	7	Smc2
694	6.19948e-135	1.5159	0.756	0.308	1.2399e-131	7	Hist1h1a
695	1.50396e-133	1.2718	0.88	0.465	3.00792e-130	7	Ezh2
696	1.82658e-131	1.15853	0.922	0.508	3.65315e-128	7	Mcm7
697	8.82032e-128	1.21882	0.994	0.861	1.76406e-124	7	Tubb5
698	1.27337e-127	1.0809	0.832	0.379	2.54674e-124	7	Dck
699	2.59136e-125	1.11447	0.966	0.663	5.18271e-122	7	Hsp90aa1
700	3.36474e-125	1.20095	0.823	0.406	6.72947e-122	7	Rrm1
701	1.89768e-121	1.05944	0.916	0.468	3.79536e-118	7	Maz
702	8.18638e-119	1.82427	0.827	0.47	1.63728e-115	7	H2-T22
703	7.12303e-116	1.07845	0.886	0.483	1.42461e-112	7	Nasp
704	2.87977e-114	1.21912	0.834	0.376	5.75954e-111	7	Ube2s
705	1.32792e-112	1.51585	0.768	0.332	2.65584e-109	7	Pttg1
706	9.73673e-111	1.24651	0.857	0.494	1.94735e-107	7	Siva1
707	2.93037e-110	1.57009	0.758	0.322	5.86073e-107	7	Cks2
708	1.63369e-102	1.43651	0.779	0.385	3.26738e-99	7	Anxa2
709	1.71072e-98	1.31426	0.695	0.248	3.42143e-95	7	Cdc20
710	1.6705e-96	1.3279	0.707	0.262	3.341e-93	7	Hist1h2bj
711	1.24462e-92	1.44841	0.699	0.287	2.48925e-89	7	Fbxo5
712	1.20105e-88	1.28074	0.88	0.583	2.40209e-85	7	Tubb4b
713	6.38877e-86	1.10625	0.619	0.12	1.27775e-82	7	Spc25
714	7.99632e-81	1.23127	0.697	0.298	1.59926e-77	7	Tacc3
715	6.77804e-79	1.17418	0.804	0.528	1.35561e-75	7	Mcm6
716	3.9309e-78	1.48529	0.64	0.157	7.86181e-75	7	Ccnb2
717	5.64181e-73	1.76667	0.69	0.344	1.12836e-69	7	Hist1h1e
718	2.39174e-70	1.36603	0.735	0.375	4.78347e-67	7	Hist1h2al
719	6.70395e-66	1.12145	0.682	0.312	1.34079e-62	7	Hist1h3e
720	2.36529e-59	1.19469	0.646	0.23	4.73057e-56	7	Cdca3
721	8.76281e-52	1.18462	0.575	0.16	1.75256e-48	7	Ccnb1
722	3.90093e-48	1.08636	0.571	0.211	7.80185e-45	7	Hist1h1d
723	9.98281e-41	1.3589	0.606	0.338	1.99656e-37	7	Hist2h2bb.1
724	1.15156e-32	1.25146	0.621	0.361	2.30312e-29	7	Cenpa
725	1.4052e-22	1.26114	0.566	0.33	2.81041e-19	7	Hist1h4d
726	2.55092e-284	1.71963	0.84	0.114	5.10184e-281	8	Cenpf
727	2.77753e-275	2.34981	0.873	0.153	5.55507e-272	8	Ccnb2
728	5.53545e-197	2.80564	0.919	0.353	1.10709e-193	8	Cenpa
729	3.08216e-177	2.24925	0.89	0.332	6.16432e-174	8	Pttg1
730	1.78163e-176	1.77486	0.983	0.648	3.56327e-173	8	2700094K13Rik
731	1.41975e-163	1.25465	1	0.916	2.8395e-160	8	Hmgn2
732	6.99461e-160	1.78815	0.986	0.688	1.39892e-156	8	Lgals1
733	8.17381e-158	0.843287	1	0.997	1.63476e-154	8	Tmsb4x
734	4.2437e-150	1.67283	0.986	0.722	8.4874e-147	8	Ly6e
735	4.30435e-144	2.00247	0.821	0.262	8.6087e-141	8	Birc5
736	7.61678e-139	1.42625	0.78	0.249	1.52336e-135	8	Lockd
737	1.2889e-138	1.80316	0.971	0.61	2.5778e-135	8	Hmgb2
738	2.31409e-137	1.22347	0.998	0.893	4.62818e-134	8	Vim
739	2.56892e-130	1.43368	0.962	0.556	5.13783e-127	8	Klf2
740	1.31518e-112	1.22004	0.988	0.789	2.63036e-109	8	Crip1
741	1.31699e-107	1.83013	0.921	0.589	2.63397e-104	8	Ifi27l2a
742	6.70619e-102	1.25585	0.9	0.502	1.34124e-98	8	Dap
743	3.63161e-101	0.981209	0.993	0.71	7.26321e-98	8	Stmn1
744	5.76326e-101	1.6581	0.725	0.25	1.15265e-97	8	Cdc20
745	1.79337e-97	1.22469	0.967	0.733	3.58674e-94	8	H2-D1
746	1.14675e-96	1.18622	0.644	0.138	2.2935e-93	8	Tpx2
747	1.34533e-88	0.941068	0.639	0.168	2.69065e-85	8	Ccna2
748	6.36255e-88	1.21854	0.914	0.64	1.27251e-84	8	Hsp90b1
749	1.15996e-86	1.69604	0.84	0.484	2.31992e-83	8	Igfbp4
750	1.86441e-86	0.859434	0.986	0.849	3.72882e-83	8	Fxyd5
751	3.12095e-85	0.889593	0.986	0.849	6.24191e-82	8	H2afz
752	4.74156e-85	1.031	0.89	0.502	9.48313e-82	8	Ms4a6b
753	2.34494e-81	0.735384	0.794	0.378	4.68988e-78	8	Mpp1
754	8.1918e-81	0.912713	0.983	0.738	1.63836e-77	8	S100a10
755	3.19266e-77	1.08272	0.617	0.15	6.38533e-74	8	Cep55
756	4.22786e-73	1.10879	0.73	0.388	8.45572e-70	8	Fbln1
757	8.8643e-72	0.850385	0.986	0.826	1.77286e-68	8	H2afv
758	2.906e-71	0.972227	0.593	0.163	5.812e-68	8	Ccnb1
759	4.12242e-71	1.1141	0.835	0.478	8.24484e-68	8	Ms4a4b
760	3.7245e-70	0.844618	0.938	0.656	7.449e-67	8	Tspo
761	5.44885e-70	0.711115	0.986	0.796	1.08977e-66	8	Hint1
762	9.49816e-70	0.781454	0.971	0.752	1.89963e-66	8	Txn1
763	1.69105e-68	0.941575	0.955	0.708	3.38211e-65	8	Ptms
764	3.44965e-66	0.887609	0.689	0.274	6.8993e-63	8	Acsl5
765	5.37563e-62	0.772173	0.986	0.706	1.07513e-58	8	Emp3
766	8.94199e-60	0.80606	0.639	0.234	1.7884e-56	8	Cdca3
767	4.12612e-59	0.898572	0.672	0.324	8.25224e-56	8	2610318N02Rik
768	7.83593e-59	0.541357	0.658	0.311	1.56719e-55	8	Phf11b
769	2.40144e-58	0.881924	0.885	0.652	4.80289e-55	8	Atp1b3
770	1.11805e-56	0.543701	0.624	0.314	2.2361e-53	8	Rdm1
771	4.03469e-56	0.568382	0.787	0.429	8.06937e-53	8	Gm10282
772	5.08299e-56	0.788639	0.952	0.751	1.0166e-52	8	Dynll1
773	8.74886e-52	0.698655	0.849	0.558	1.74977e-48	8	Srgn
774	1.68894e-51	0.633691	0.823	0.536	3.37788e-48	8	Rnaseh2c
775	6.13511e-51	0.53244	0.507	0.108	1.22702e-47	8	Aspm
776	2.23049e-50	0.676817	0.921	0.668	4.46098e-47	8	Cdk2ap2
777	2.55525e-50	0.649747	0.9	0.555	5.1105e-47	8	Anp32e
778	5.77197e-47	0.795581	0.598	0.225	1.15439e-43	8	Mki67
779	6.51274e-47	0.680104	0.907	0.669	1.30255e-43	8	Lsm5
780	1.29766e-46	0.913327	0.73	0.436	2.59532e-43	8	H2-Q1
781	1.49796e-45	0.627093	0.667	0.368	2.99592e-42	8	Hmgn5
782	9.48944e-45	1.99339	0.632	0.268	1.89789e-41	8	Ube2c
783	1.78609e-44	0.60915	0.701	0.392	3.57217e-41	8	Tsc22d3
784	2.13227e-44	0.625875	0.866	0.567	4.26454e-41	8	Ddx39
785	4.39264e-44	1.03191	0.797	0.552	8.78529e-41	8	Cks1b
786	1.22488e-43	1.22994	0.641	0.274	2.44976e-40	8	Cdca8
787	1.52676e-43	0.595014	0.861	0.592	3.05352e-40	8	1700097N02Rik
788	3.50638e-43	0.606943	0.969	0.838	7.01276e-40	8	Psme2
789	1.8199e-42	0.790128	0.67	0.357	3.6398e-39	8	H2-Q6
790	6.55053e-42	1.06139	0.55	0.149	1.31011e-38	8	Cdkn3
791	9.83415e-42	0.591575	0.897	0.62	1.96683e-38	8	Anapc11
792	1.6747e-40	0.662596	0.885	0.613	3.3494e-37	8	Smc4
793	2.46498e-40	0.598027	0.873	0.615	4.92995e-37	8	Snrpa
794	3.63032e-40	0.589203	0.751	0.469	7.26064e-37	8	H2-K1
795	1.66652e-39	0.879041	0.615	0.322	3.33304e-36	8	Racgap1
796	3.11595e-39	0.61882	0.727	0.47	6.23191e-36	8	Gm6594
797	1.58246e-37	0.670642	0.687	0.396	3.16493e-34	8	Slfn1
798	9.99508e-37	0.648702	0.746	0.486	1.99902e-33	8	Mndal
799	5.98342e-36	0.65038	0.421	0.088	1.19668e-32	8	Hmmr
800	8.21082e-36	0.539405	0.892	0.631	1.64216e-32	8	Hspa5
801	2.86875e-33	0.563087	0.653	0.394	5.7375e-30	8	Xaf1
802	4.00406e-33	0.709561	0.756	0.507	8.00812e-30	8	Rad21
803	8.33365e-33	0.535468	0.833	0.579	1.66673e-29	8	Tagln2
804	9.74829e-31	0.607419	0.799	0.566	1.94966e-27	8	Pdia6
805	1.15876e-30	0.658036	0.77	0.525	2.31752e-27	8	Lmnb1
806	7.55025e-30	0.59564	0.569	0.273	1.51005e-26	8	Crmp1
807	7.84816e-30	0.604212	0.457	0.178	1.56963e-26	8	Plk1
808	5.21045e-29	0.786394	0.514	0.144	1.04209e-25	8	Kif20a
809	6.59565e-29	0.759123	0.694	0.477	1.31913e-25	8	Cenpw
810	3.38718e-27	0.617333	0.677	0.44	6.77436e-24	8	Add3
811	1.08053e-25	1.09221	0.78	0.589	2.16107e-22	8	Tubb4b
812	4.84333e-25	0.582826	0.593	0.345	9.68667e-22	8	Trim59
813	1.57823e-23	1.29659	0.579	0.332	3.15646e-20	8	Cks2
814	4.93974e-23	0.5957	0.548	0.318	9.87948e-20	8	Dlgap5
815	4.74295e-21	0.594302	0.493	0.18	9.4859e-18	8	Knstrn
816	6.10103e-20	0.662942	0.598	0.382	1.22021e-16	8	S1pr1
817	1.00266e-17	0.56582	0.478	0.157	2.00532e-14	8	Cenpe
818	6.17684e-16	0.57677	0.522	0.307	1.23537e-12	8	Tacc3
819	1.53248e-15	0.533959	0.622	0.419	3.06497e-12	8	Fkbp2
820	4.53035e-15	0.535359	0.6	0.404	9.0607e-12	8	Ass1
821	5.06252e-13	0.967986	0.536	0.376	1.0125e-09	8	Tuba1c
822	5.65651e-13	0.61247	0.581	0.423	1.1313e-09	8	Nde1
823	6.70368e-10	0.542306	0.433	0.279	1.34074e-06	8	Gpsm2
824	1.7234e-08	0.838688	0.445	0.202	3.4468e-05	8	Cdc25b
825	0.000908197	0.632977	0.947	0.833	1	8	Arl6ip1
826	2.16797e-163	3.14717	0.951	0.56	4.33593e-160	9	Isg15
827	2.16068e-138	0.986467	0.588	0.111	4.32136e-135	9	Mx1
828	1.22152e-118	2.30089	0.741	0.244	2.44303e-115	9	Ifit1
829	2.38127e-107	1.9657	0.86	0.459	4.76253e-104	9	Irf7
830	4.8564e-106	1.3753	0.561	0.112	9.71279e-103	9	Ifit3
831	5.17768e-94	1.76014	0.793	0.377	1.03554e-90	9	Rtp4
832	3.93924e-92	1.85208	0.875	0.57	7.87847e-89	9	Stat1
833	2.91241e-75	0.63554	0.427	0.089	5.82481e-72	9	Rsad2
834	1.07756e-70	1.52753	0.811	0.516	2.15512e-67	9	Zbp1
835	6.57886e-70	1.77321	0.796	0.497	1.31577e-66	9	Bst2
836	2.33257e-66	1.46831	0.601	0.23	4.66513e-63	9	Usp18
837	4.47145e-63	1.90609	0.692	0.349	8.94289e-60	9	Isg20
838	6.46468e-54	1.14159	0.72	0.436	1.29294e-50	9	Lgals3bp
839	1.80832e-52	1.65745	0.689	0.398	3.61664e-49	9	Slfn1
840	7.61222e-48	1.33749	0.604	0.314	1.52244e-44	9	Phf11b
841	4.76918e-46	0.995428	0.689	0.4	9.53837e-43	9	Gbp4
842	5.15139e-46	1.34944	0.579	0.247	1.03028e-42	9	Slfn5
843	1.60691e-45	1.09481	0.866	0.704	3.21382e-42	9	Lgals9
844	4.02777e-44	0.397367	0.396	0.076	8.05554e-41	9	Oasl1
845	1.22398e-43	1.35902	0.72	0.488	2.44796e-40	9	Mndal
846	2.13784e-41	1.42601	0.649	0.396	4.27569e-38	9	Xaf1
847	1.42824e-39	0.885876	0.561	0.307	2.85648e-36	9	H2-T24
848	4.15601e-37	1.27057	0.689	0.49	8.31202e-34	9	Ifi35
849	4.85491e-36	0.885579	0.82	0.651	9.70982e-33	9	Slfn2
850	6.39793e-35	0.567858	0.402	0.136	1.27959e-31	9	Cmpk2
851	6.82702e-35	1.28081	0.68	0.478	1.3654e-31	9	Ifi47
852	3.10253e-33	1.21998	0.579	0.363	6.20506e-30	9	Trim30a
853	4.44596e-33	0.879755	0.845	0.705	8.89192e-30	9	Ccnd2
854	4.70063e-33	0.939102	0.707	0.479	9.40126e-30	9	H2-T22
855	1.04392e-32	0.854082	0.5	0.236	2.08784e-29	9	Tgtp2
856	1.47789e-32	0.884003	0.537	0.317	2.95577e-29	9	Slfn8
857	2.58181e-31	1.13436	0.558	0.318	5.16363e-28	9	Rnf213
858	4.92958e-31	0.798671	0.524	0.306	9.85917e-28	9	Ifih1
859	2.08766e-30	1.12172	0.622	0.407	4.17532e-27	9	Daxx
860	3.91963e-29	1.01922	0.713	0.552	7.83926e-26	9	Psmb10
861	5.15099e-28	0.348103	0.518	0.32	1.0302e-24	9	Fam111a
862	3.34793e-27	0.976034	0.524	0.311	6.69585e-24	9	Gbp7
863	3.85941e-27	1.27631	0.57	0.362	7.71882e-24	9	Epsti1
864	6.45914e-27	0.657362	0.933	0.84	1.29183e-23	9	Psme2
865	1.11834e-26	0.699077	0.884	0.737	2.23669e-23	9	H2-D1
866	1.3687e-26	1.02289	0.521	0.279	2.7374e-23	9	Pydc3
867	3.30791e-26	0.915768	0.588	0.394	6.61582e-23	9	Parp9
868	6.07993e-25	0.744513	0.808	0.662	1.21599e-21	9	Tspo
869	1.07035e-24	0.614523	0.909	0.813	2.14071e-21	9	B2m
870	4.12761e-24	0.591679	0.466	0.235	8.25521e-21	9	BC094916
871	7.22575e-24	1.32403	0.643	0.485	1.44515e-20	9	Ms4a4b
872	5.18522e-23	0.951343	0.68	0.51	1.03704e-19	9	Ms4a6b
873	5.8424e-23	0.328318	0.32	0.104	1.16848e-19	9	Amica1
874	9.50575e-22	1.09825	0.585	0.425	1.90115e-18	9	Ifi203
875	4.34158e-21	0.694568	0.741	0.574	8.68315e-18	9	Psmb9
876	1.84778e-19	0.496925	0.436	0.242	3.69557e-16	9	Eif2ak2
877	4.23779e-19	0.938702	0.631	0.496	8.47559e-16	9	H2-T23
878	4.98061e-19	0.323559	0.537	0.385	9.96123e-16	9	S1pr1
879	1.54042e-18	0.736976	0.625	0.474	3.08084e-15	9	H2-K1
880	4.1809e-18	0.684186	0.546	0.379	8.36179e-15	9	Samhd1
881	2.08782e-17	1.16187	0.701	0.597	4.17563e-14	9	Ifi27l2a
882	4.3664e-17	0.68392	0.61	0.468	8.7328e-14	9	Tap1
883	5.94376e-16	0.575301	0.424	0.221	1.18875e-12	9	Dhx58
884	6.54881e-16	0.587918	0.582	0.442	1.30976e-12	9	H2-Q1
885	1.53059e-15	0.467649	0.939	0.882	3.06119e-12	9	Ltb
886	3.84329e-15	0.961149	0.515	0.374	7.68659e-12	9	Irgm1
887	1.43239e-12	0.259342	0.634	0.492	2.86478e-09	9	Arl5c
888	1.5334e-12	0.687129	0.54	0.426	3.0668e-09	9	Irf9
889	2.72535e-12	0.942617	0.503	0.36	5.4507e-09	9	Igtp
890	6.96179e-11	0.254233	0.326	0.112	1.39236e-07	9	Oas2
891	2.04675e-10	1.03223	0.463	0.355	4.0935e-07	9	Pyhin1
892	2.70713e-10	0.278147	1	0.983	5.41425e-07	9	Cd52
893	4.12265e-10	0.769249	0.518	0.415	8.24529e-07	9	Gbp9
894	1.12554e-09	0.375116	0.399	0.259	2.25109e-06	9	Apol7b
895	1.182e-09	0.52191	0.616	0.517	2.36401e-06	9	Smchd1
896	1.28192e-09	0.407145	0.534	0.425	2.56384e-06	9	Ncoa7
897	1.5763e-08	0.369111	0.39	0.248	3.1526e-05	9	9930111J21Rik2
898	1.51847e-07	0.257641	0.482	0.373	0.000303693	9	H2-Q2
899	9.27759e-07	0.301826	0.701	0.608	0.00185552	9	Zfp36l1
900	1.27293e-06	0.749592	0.405	0.304	0.00254587	9	Parp14
901	1.63129e-06	0.38875	0.457	0.364	0.00326257	9	H2-Q6
902	9.37754e-06	0.860907	0.448	0.348	0.0187551	9	Phf11c
903	1.15432e-05	0.517969	0.412	0.315	0.0230864	9	Trim25
904	0.000109213	0.662241	0.512	0.475	0.218425	9	1600014C10Rik
905	0.000653344	0.516954	0.433	0.374	1	9	Sell
906	0.000672246	0.629379	0.326	0.172	1	9	Ifitm3
907	0.0015988	0.29824	0.451	0.39	1	9	Ctss
908	0.00191791	0.769187	0.387	0.314	1	9	Gbp2
909	0.00298791	0.260542	0.723	0.681	1	9	Ctsw
910	0.00874425	0.293564	0.262	0.3	1	9	Ms4a6d
911	0	3.83616	0.977	0.009	0	10	Fcer1g
912	0	2.84243	0.86	0	0	10	Igfbp7
913	0	2.70755	0.977	0.024	0	10	S100a4
914	0	2.31341	0.651	0	0	10	Upp1
915	0	2.31253	0.93	0	0	10	Serpina3g
916	0	1.80325	0.907	0.007	0	10	Klrb1f
917	0	1.7759	0.605	0	0	10	Chad
918	0	1.56409	0.744	0	0	10	Batf3
919	0	1.50271	0.791	0	0	10	Klrb1a
920	0	1.44176	0.86	0	0	10	Il1r1
921	0	1.43722	0.884	0	0	10	Clnk
922	0	1.3117	0.837	0	0	10	Kcnk1
923	0	1.14101	0.814	0	0	10	Serpina3f
924	0	1.0663	0.767	0	0	10	Klrb1b
925	1.80305e-277	2.2908	0.86	0.022	3.60609e-274	10	Rasl11a
926	1.92219e-233	1.46422	0.605	0.002	3.84439e-230	10	Pxdc1
927	4.6198e-123	2.48897	0.791	0.004	9.2396e-120	10	Tyrobp
928	7.99486e-109	1.04269	0.581	0.003	1.59897e-105	10	Ccr6
929	2.65061e-103	5.31459	1	0.045	5.30123e-100	10	Lgals3
930	1.3205e-96	1.3032	0.767	0.057	2.64101e-93	10	Pdzk1
931	3.98278e-87	2.51344	0.86	0.049	7.96556e-84	10	Nrgn
932	4.86231e-68	1.1456	0.837	0.052	9.72462e-65	10	Coro2a
933	9.22145e-65	1.05207	0.674	0.031	1.84429e-61	10	H2-Ab1
934	8.45343e-59	4.82938	1	0.093	1.69069e-55	10	S100a6
935	7.3211e-56	1.03633	0.837	0.097	1.46422e-52	10	Rhob
936	8.6608e-56	1.82481	0.698	0.074	1.73216e-52	10	H2-Aa
937	7.35318e-52	1.43317	0.721	0.055	1.47064e-48	10	Serpine2
938	2.71672e-38	1.75977	0.86	0.105	5.43343e-35	10	Il17re
939	1.03973e-37	1.19677	0.698	0.096	2.07945e-34	10	H2-Eb1
940	2.47088e-37	3.09418	0.977	0.238	4.94175e-34	10	AW112010
941	4.81536e-36	2.79964	0.953	0.248	9.63071e-33	10	Capg
942	4.63238e-35	1.60595	0.628	0.014	9.26475e-32	10	5430421N21Rik
943	4.69063e-34	1.6199	0.837	0.11	9.38126e-31	10	Susd2
944	1.48071e-33	3.88795	1	0.279	2.96142e-30	10	Tmem176a
945	2.80878e-33	1.13864	0.814	0.177	5.61755e-30	10	Nr1d1
946	5.84909e-31	2.49173	0.86	0.193	1.16982e-27	10	Hmgn3
947	2.49037e-30	1.03653	0.767	0.13	4.98074e-27	10	Irf5
948	3.07796e-30	3.5965	0.977	0.267	6.15593e-27	10	Tmem176b
949	1.443e-29	1.20285	0.698	0.072	2.886e-26	10	Il18r1
950	6.22072e-29	2.98289	1	0.374	1.24414e-25	10	Il7r
951	2.57205e-28	1.21333	0.628	0.051	5.1441e-25	10	Plcg2
952	5.75167e-27	2.24473	0.953	0.443	1.15033e-23	10	Il2rb
953	4.30499e-25	4.07295	0.93	0.407	8.60998e-22	10	Cd7
954	6.81995e-25	1.62697	0.814	0.208	1.36399e-21	10	Socs3
955	4.29376e-24	1.88423	0.884	0.345	8.58752e-21	10	Cd160
956	6.1442e-24	1.67195	0.907	0.426	1.22884e-20	10	Adgrg5
957	2.70577e-23	2.07018	1	0.477	5.41155e-20	10	Cd82
958	4.04809e-23	1.98743	0.93	0.323	8.09618e-20	10	Efhd2
959	4.26515e-23	1.27662	0.86	0.299	8.53029e-20	10	Traf1
960	1.30789e-22	1.21874	0.721	0.107	2.61578e-19	10	Amica1
961	2.20845e-22	1.39363	0.907	0.313	4.41689e-19	10	Fosb
962	2.76839e-22	2.57832	1	0.383	5.53678e-19	10	Jun
963	3.45331e-21	1.67959	0.814	0.294	6.90662e-18	10	Ubash3b
964	7.96826e-21	1.79054	0.977	0.569	1.59365e-17	10	Sec11c
965	2.60855e-20	1.93664	1	0.633	5.21711e-17	10	Sptssa
966	3.44061e-20	1.10305	0.86	0.345	6.88122e-17	10	Mapkapk3
967	5.61331e-20	1.63868	1	0.815	1.12266e-16	10	B2m
968	6.98661e-20	2.16371	0.953	0.438	1.39732e-16	10	Sepp1
969	1.34513e-19	1.44614	0.791	0.255	2.69025e-16	10	Slc6a13
970	5.01538e-19	1.78981	1	0.739	1.00308e-15	10	H2-D1
971	4.21133e-18	1.56605	0.814	0.228	8.42265e-15	10	S100a11
972	1.57136e-17	2.51964	0.907	0.493	3.14272e-14	10	Odc1
973	1.65535e-17	1.79978	0.837	0.308	3.31069e-14	10	St6galnac2
974	1.92672e-17	1.25842	0.814	0.264	3.85344e-14	10	Rarg
975	3.45598e-17	1.73974	0.977	0.566	6.91196e-14	10	Srgn
976	5.65366e-17	1.06657	0.837	0.379	1.13073e-13	10	2021-09-11
977	1.09588e-16	1.47112	0.953	0.476	2.19176e-13	10	H2-K1
978	2.37114e-16	1.14339	0.442	0	4.74228e-13	10	Serpinb1a
979	3.52203e-15	1.99678	0.953	0.745	7.04405e-12	10	Gpx1
980	5.10991e-15	2.62733	0.791	0.379	1.02198e-11	10	Ckb
981	1.65714e-14	1.28326	0.86	0.423	3.31427e-11	10	Ecm1
982	1.84697e-14	1.06195	0.837	0.365	3.69394e-11	10	H2-Q6
983	2.56765e-14	1.14609	0.884	0.386	5.1353e-11	10	Glipr2
984	2.74262e-14	1.01631	0.86	0.394	5.48523e-11	10	Xbp1
985	3.96137e-14	1.26893	0.977	0.609	7.92275e-11	10	Zfp36l1
986	8.54234e-14	1.16195	0.744	0.296	1.70847e-10	10	5830411N06Rik
987	1.01637e-13	1.36689	0.744	0.356	2.03273e-10	10	Cd9
988	1.10252e-13	1.57432	0.814	0.311	2.20503e-10	10	Prr13
989	1.16556e-13	1.50302	0.977	0.586	2.33113e-10	10	Tagln2
990	1.20341e-13	1.56321	0.837	0.399	2.40683e-10	10	Anxa2
991	2.9087e-13	1.07532	0.86	0.425	5.8174e-10	10	Serinc3
992	7.27251e-13	1.57347	0.814	0.397	1.4545e-09	10	Id2
993	9.90162e-13	1.02367	1	0.853	1.98032e-09	10	Fxyd5
994	1.0354e-12	1.42691	0.744	0.264	2.07079e-09	10	BC018473
995	1.69087e-12	1.57129	0.93	0.697	3.38174e-09	10	Lgals1
996	5.41901e-12	1.4752	0.674	0.301	1.0838e-08	10	Hebp1
997	1.36959e-11	1.35938	1	0.758	2.73919e-08	10	Junb
998	1.65807e-11	2.87195	0.767	0.46	3.31613e-08	10	Cd74
999	2.41205e-11	1.22586	0.93	0.664	4.82409e-08	10	Tspo
1000	1.2168e-10	1.31253	0.674	0.257	2.43359e-07	10	Prr29
1001	2.78999e-10	1.04921	0.977	0.745	5.57997e-07	10	S100a10
1002	3.11289e-10	1.16157	0.814	0.478	6.22579e-07	10	Plp2
1003	9.3695e-10	1.04769	0.884	0.412	1.8739e-06	10	Fos
1004	1.98291e-09	1.03227	0.977	0.675	3.96582e-06	10	Cdk2ap2
1005	1.36717e-07	1.04223	0.93	0.681	0.000273434	10	Rgcc
1006	2.13037e-07	1.03542	0.86	0.619	0.000426074	10	Manf
1007	2.31675e-07	1.24635	0.628	0.247	0.000463351	10	F2r
1008	3.62643e-07	1.27224	0.674	0.359	0.000725285	10	Syngr2
1009	8.82763e-06	1.27322	0.721	0.465	0.0176553	10	H1f0
1010	1.39979e-05	1.07619	0.628	0.372	0.0279958	10	Unc119
